# Supplementary material for: Indole-based mono- and poly-nuclear acyclic chelating systems: syntheses and selected transition metal complexes
Source: Royal Society of Chemistry journal article supplement (doi:10.1039/b101350p), 2001-01-01
Supplement: b101350p.doc [file b101350p.doc]

**Analytical***a* **and physical data for compounds**

| Compound | Mp*b*/°C | Yield (%) | C=N*c*/cm-1 | max*f*/nm | /M-1cm-1 | Analysis (%) | | |
| --- | --- | --- | --- | --- | --- | --- | --- | --- |
|  |  |  |  |  |  | C | H | N |
| **3** | 223-224 | 84 | 1592s*d,e* | 232, 252, 264, 324, 348 | 23700, 28500, 19100, 14000, 12500 | 64.8  (64.7) | 4.5  (4.5) | 4.3  (4.4) |
| **4** | 250-252 | 45 | 1597vs | 230, 252, 324, 357 | 39100, 35700, 20400, 27300 | 67.9  (68.3) | 4.8  (4.6) | 7.6  (8.0) |
| **4a** | >300*b* | 95 | 1586s | 211, 266, 517 | *g* | 63.0  (63.2) | 4.2  (4.0) | 7.1  (7.4) |
| **4b** | >300*b* | 94 | 1584vs | 276, 368, 493 | *g* | 62.9  (63.2) | 4.1  (4.0) | 7.2  (7.4) |
| **4c** | >300*b* | 65 | 1597vs | 222, 251, 269, 319, 359, 447 | *g* | 62.6  (62.8) | 4.1  (4.0) | 7.0  (7.3) |
| **4d** | >300*b* | 86 | 1545vs | 230, 274, 360, 400, 500 | *g* | 59.2  (59.5) | 3.9  (3.7) | 6.6  (6.9) |
| **5** | 160-162 | 85 | 1587s | 234, 256, 280, 316, 372 | 51900, 51600, 41300, 31900, 36000 | 69.5  (69.5) | 5.0  (4.7) | 8.6  (8.8) |
| **5a** | 290*b* | 50 | 1540s | 212, 270, 290, 346, 398, 486 | 75800, 49000, 46100, 29300, 16900, 20000 | 64.3*i,1*  (64.2) | 4.4  (4.2) | 8.0  (8.1) |
| **5b** | 290*b* | 31 | 1543s | 214, 281, 477 | 46200, 30400, 13500 | 59.0*i,5*  (58.7) | 4.6  (4.8) | 7.6  (7.4) |
| **5c** | 290*b* | 46 | 1543vs | 211, 266, 286, 460 | 79300, 48700, 45700, 35100 | 62.4*i,2*  (61.9) | 4.4  (4.4) | 7.5  (7.9) |
| **5d** | 300*b* | 75 | 1545s | 212, 248 | *g* | 63.6*i,1*  (63.1) | 4.4  (4.3) | 7.7  (8.0) |
| **6** | 345-348*b* | 95 | 1595vs | 276 | *g* | 71.1  (70.9) | 4.7  (4.7) | 7.1  (7.2) |
| **6a** | >300*b* | 75 | 1588vs | 287, 398 | 40400, 21000 | 66.2  (66.0) | 4.0  (4.1) | 6.5  (6.7) |
| **6b** | >300*b* | 86 | 1589s | 272, 295, 403 | 38700, 38800, 23900 | 65.7  (66.0) | 3.9  (4.1) | 6.5  (6.7) |
| **6c** | >300*b* | 80 | 1588s | 271, 293, 360, 428 | 41800, 46400, 16300, 30000 | 65.7  (65.7) | 4.0  (4.1) | 6.4  (6.7) |
| **6d** | >300*b* | 87 | 1549s | 212, 232, 293, 365, 412 | 112000, 68300, 55100, 25600, 40600 | 65.6  (65.5) | 4.3  (4.1) | 6.5  (6.7) |
| **7** | 350*b* | 65 | 1584vs | 231, 256, 374 | 61800, 54800, 66900 | 71.3  (71.1) | 5.0  (4.8) | 6.8  (7.1) |
| **7a** | 350*b* | 85 | 1586s | 231, 281, 302, 430 | *g* | 65.8*i,1*  (65.7) | 4.4  (4.3) | 6.1  (6.5) |
| **7b** | 360*b* | 80 | 1589s | 277, 443, 507 | *g* | 65.5*i,1*  (65.7) | 4.5  (4.3) | 6.2  (6.5) |
| **8** | >280*b* | 75 | 1584vs | 230, 256, 374 | 60100, 26300, 28400 | 71.1  (71.4) | 5.3  (5.0) | 6.7  (6.9) |
| **8a** | 350*b* | 78 | 1584vs | 212, 250 | *g* | 66.5  (66.7) | 4.4  (4.4) | 6.2  (6.5) |
| **8b** | 350*b* | 82 | 1547vs | 211, 251 | *g* | 66.1  (66.2) | 4.4  (4.4) | 6.2  (6.4) |
| **9** | >270*b* | 23 | 1561vs | 210, 229, 258, 382 | 46500, 37100, 35400, 39200 | 68.0  (68.3) | 4.9  (4.6) | 7.6  (8.0) |
| **9a** | 350*b* | 76 | 1539vs | 226, 278, 402 | *g* | 63.0  (63.2) | 4.2  (4.0) | 7.6  (7.4) |
| **9b** | 360*b* | 85 | 1547vs | 230, 274, 410 | *g* | 63.1  (63.2) | 4.2  (4.0) | 7.5  (7.4) |
| **9c** | 360*b* | 82 | 1543vs | 273 | *g* | 62.6  (62.8) | 4.1  (4.0) | 7.5  (7.3) |
| **10** | 352-354*b* | 62 | 1578vs | 237, 263, 408 | *g* | 67.9  (68.3) | 4.8  (4.6) | 7.7  (8.0) |
| **10a** | 350*b* | 100 | 1586vs | 252, 277, 403, 515 | *g* | *h* | *h* | *h* |
| **10b** | 350*b* | 96 | 1589vs | 252, 380, 444 | *g* | *h* | *h* | *h* |

*a* Required values in parentheses. *b* With decomposition. *c* KBr disk.  *d* Nujol mull. *e* C=O. *f* In CH3CN. *g* Sample too insoluble for the calculation of extinction coefficients. *h* Microanalytical results ± 0.5% due to polymeric nature of compound. *i,n* + *n*H2O.
